# Supplementary material for: Development of predictive risk models for major adverse cardiovascular events among patients with type 2 diabetes mellitus using health insurance claims data
Source: Springer Nature journal article supplement (doi:10.1186/s12933-018-0759-z), 2018-08-24

## Additional File 1. Study Design

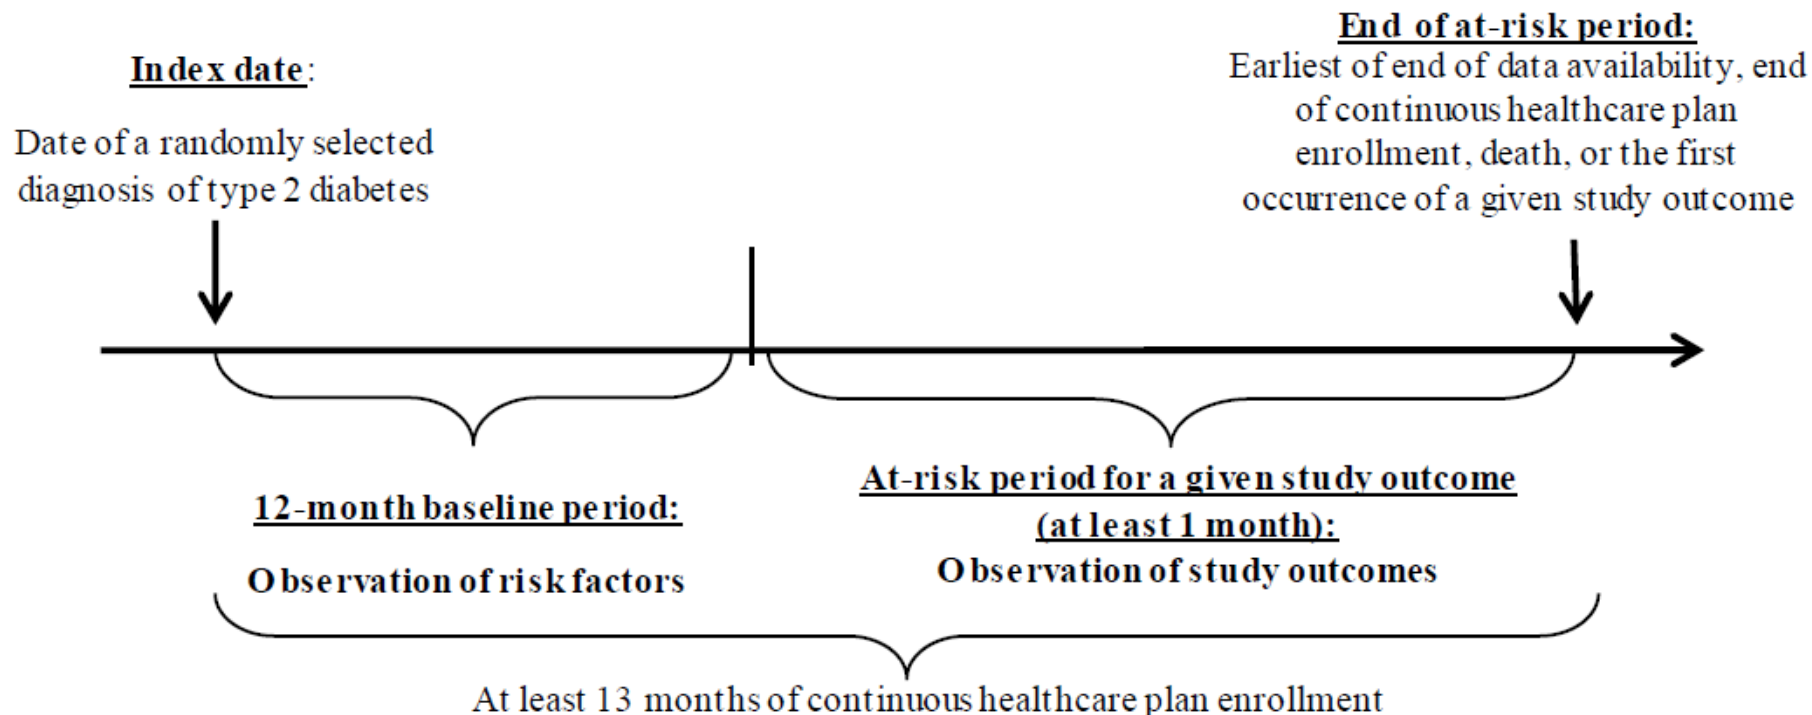

Supplement: MOESM1 [file 16071154]
